# Supplementary material
Source: HighWire-hosted journal article supplement (https://dmd.aspetjournals.org/highwire/filestream/76500/field_highwire_adjunct_files/1/DMD274_Supp_fig2.pdf)
Supplement: DMD274_Supp_fig2.pdf [file DMD274_Supp_fig2.pdf]

Tryptophan-75 is a low energy channel gating residue that facilitates substrate egress/access in cytochrome P450 2D6. McCarty, Ratliff, K. Furge, L. Furge. *Drug Metab Dispos*, DMD-AR-2020-000274.

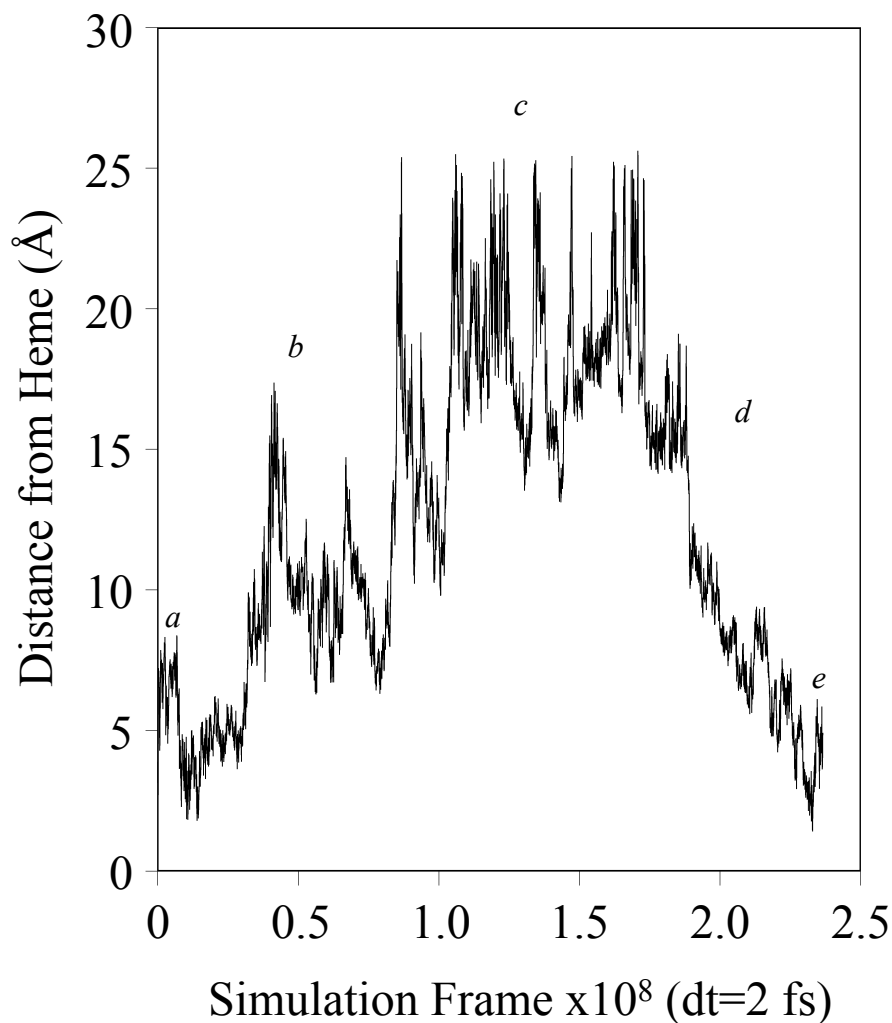

**Supp Figure S2. Example plot of the displacement of bufuralol relative to heme (the reference point) as a function of frame number over the course of a simulation.** The y-axis shows the distance bufuralol traveled from the initial docking position at the heme iron (*a*), along channel 2b (*b*), exiting channel 2b (*c*), re-entering channel 2b (*d*) and binding at the heme iron again as in the initial frame (*e*). The x-axis shows the simulation frame number. At any point in the plot it was possible to view the associated frame of the simulation of bufuralol in CYP2D6.
